# Supplementary material
Source: HighWire-hosted journal article supplement (https://ard.bmj.com/content/annrheumdis-2020-217204)
Supplement: inline-supplementary-material-1 [file inline-supplementary-material-1.pdf]

Investigation of genetically-regulated gene expression  
and response to treatment in rheumatoid arthritis  
highlights an association between *IL18RAP* expression  
and treatment response

Online Supplementary Material

**Table S1.** Effect sizes and significance levels achieved at *IL18RAP* when using either the full 3158-person expanded European ancestry cohort or when it is divided into its constituent UK (1575 people) and US/EU (1583 people) sub-cohorts.

| Reference panel  | Gene           | UK          |                 | US/EU       |                 | Full        |                 |
|------------------|----------------|-------------|-----------------|-------------|-----------------|-------------|-----------------|
|                  |                | Effect size | <i>P</i> -value | Effect size | <i>P</i> -value | Effect size | <i>P</i> -value |
| MATURA           | <i>IL18RAP</i> | -0.210      | 0.00021         | -0.054      | 0.17344         | -0.131      | 0.00014         |
| GTE <sub>x</sub> | <i>IL18RAP</i> | -0.235      | 0.00105         | -0.076      | 0.11999         | -0.152      | 0.00040         |
| DGN              | <i>IL18RAP</i> | -0.128      | 0.00025         | -0.030      | 0.21817         | -0.079      | 0.00023         |

**Table S2.** The columns “Effect MATURA”, “Effect GTE<sub>x</sub>” and “Effect DGN” represent the effects of the SNPs in the prediction models when using the MATURA (77 SNPs), GTE<sub>x</sub> (46 SNPs) and DGN (86 SNPs) reference panels. The columns “Coeff” and “*P*-value” represent the coefficient and the *P*-value from the association between the SNPs and the phenotype in the UK data set.

| SNP        | BP        | Effect MATURA | Effect GTE <sub>x</sub> | Effect DGN | Coeff  | <i>P</i> -value |
|------------|-----------|---------------|-------------------------|------------|--------|-----------------|
| rs13413645 | -         | -             | -0.040                  | -          | -      | -               |
| rs6759556  | -         | -             | 0.216                   | -          | -      | -               |
| rs2310220  | -         | -             | 0.094                   | -          | -      | -               |
| rs11465677 | -         | -             | -0.003                  | -          | -      | -               |
| rs17775170 | -         | -             | 0.009                   | -          | -      | -               |
| rs10178585 | -         | -             | -0.028                  | -          | -      | -               |
| rs10185170 | -         | -             | 0.068                   | -          | -      | -               |
| rs12328682 | -         | -             | 0.004                   | -          | -      | -               |
| rs7599071  | -         | -             | -0.010                  | -          | -      | -               |
| rs1093515  | -         | -             | -                       | 0.015      | -      | -               |
| rs13427957 | -         | -             | -                       | -0.015     | -      | -               |
| rs266064   | -         | -             | -                       | -0.004     | -      | -               |
| rs4319952  | -         | -             | -                       | -0.021     | -      | -               |
| rs7589943  | 102038936 | -             | 0.055                   | -          | 0.006  | 0.96600         |
| rs290772   | 102126220 | -             | -                       | 0.007      | -0.065 | 0.34800         |
| rs75094400 | 102142042 | 0.080         | -                       | -          | -0.236 | 0.02390         |
| rs17201799 | 102179247 | -             | 0.054                   | -          | -0.038 | 0.37600         |
| rs12990046 | 102543479 | 0.039         | -                       | -          | -0.007 | 0.85600         |
| rs11678842 | 102674806 | -0.010        | -                       | -          | 0.074  | 0.08400         |
| rs13388182 | 102722402 | -             | -                       | -0.020     | 0.032  | 0.38700         |
| rs13029804 | 102723017 | -             | -                       | 0.014      | -0.072 | 0.11000         |
| rs1812326  | 102860411 | -0.031        | -                       | -          | 0.069  | 0.05930         |
| rs10186746 | 102866377 | -0.026        | -                       | -          | 0.065  | 0.07800         |
| rs62151694 | 102899464 | 0.049         | -                       | -          | -0.072 | 0.25500         |
| rs13007174 | 102960487 | 0.006         | -                       | -          | -0.081 | 0.17300         |
| rs13014044 | 102961366 | 0.005         | -                       | -          | -0.087 | 0.14800         |
| rs1946131  | 102961929 | 0.005         | -                       | -          | -0.077 | 0.19600         |
| rs1054096  | 102962350 | 0.005         | -                       | -          | -0.079 | 0.18600         |
| rs12989197 | 102962739 | 0.004         | -                       | -          | -0.075 | 0.21100         |
| rs12996097 | 102963628 | 0.004         | -                       | -          | -0.081 | 0.17400         |
| rs13028993 | 102963949 | 0.004         | -                       | -          | -0.076 | 0.20100         |
| rs12999542 | 102965392 | -             | -                       | 0.017      | -0.083 | 0.16300         |
| rs13014644 | 102971363 | 0.015         | -                       | -          | -0.079 | 0.18500         |
| rs13015714 | 102971865 | -             | 0.018                   | -          | 0.111  | 0.00955         |
| rs11465567 | 102978400 | 0.006         | -                       | -          | -0.072 | 0.22800         |

|            |           |        |       |       |        |         |
|------------|-----------|--------|-------|-------|--------|---------|
| rs11465572 | 102980223 | 0.001  | -     | -     | -0.071 | 0.23200 |
| rs4134504  | 102982223 | 0.005  | -     | -     | -0.081 | 0.17000 |
| rs2058622  | 102985424 | -      | -     | 0.016 | 0.112  | 0.00945 |
| rs2058623  | 102986170 | -      | -     | 0.015 | 0.113  | 0.00863 |
| rs1465321  | 102986618 | -      | -     | 0.002 | 0.113  | 0.00863 |
| rs11465597 | 102987213 | -      | -     | 0.006 | -0.057 | 0.33600 |
| rs10439410 | 102990788 | 0.007  | -     | 0.031 | -0.143 | 0.00005 |
| rs6731157  | 102991191 | 0.006  | -     | -     | -0.143 | 0.00005 |
| rs6745614  | 102991213 | 0.007  | -     | -     | -0.143 | 0.00005 |
| rs6758936  | 102991369 | 0.007  | -     | 0.016 | -0.143 | 0.00005 |
| rs2270297  | 102992675 | -      | 0.011 | 0.050 | 0.115  | 0.00729 |
| rs11465623 | 102993039 | -      | 0.058 | 0.019 | -0.020 | 0.76900 |
| rs6753717  | 102993161 | -      | 0.012 | 0.048 | 0.115  | 0.00729 |
| rs2041739  | 102994333 | 0.012  | -     | 0.018 | -0.143 | 0.00006 |
| rs6750020  | 102994714 | -      | 0.013 | 0.046 | 0.114  | 0.00807 |
| rs10208196 | 102996345 | 0.007  | -     | 0.019 | -0.143 | 0.00005 |
| rs7556917  | 102997720 | 0.008  | -     | -     | -0.143 | 0.00005 |
| rs7584093  | 102997721 | 0.008  | -     | -     | -0.143 | 0.00006 |
| rs3213733  | 102997884 | -      | -     | 0.001 | -0.102 | 0.03120 |
| rs3213732  | 102998279 | 0.008  | -     | 0.021 | -0.144 | 0.00005 |
| rs10204757 | 102998974 | 0.008  | -     | -     | -0.143 | 0.00005 |
| rs6760621  | 102999952 | 0.008  | -     | 0.021 | -0.143 | 0.00005 |
| rs11465641 | 103000868 | 0.009  | -     | -     | -0.143 | 0.00005 |
| rs17651485 | 103001650 | -      | 0.057 | 0.086 | -0.027 | 0.68000 |
| rs3771161  | 103003961 | -      | -     | 0.001 | -0.099 | 0.03470 |
| rs3771159  | 103004958 | 0.009  | -     | -     | -0.143 | 0.00005 |
| rs11903946 | 103005330 | 0.009  | -     | -     | -0.143 | 0.00005 |
| rs6706002  | 103006104 | 0.009  | -     | 0.023 | -0.143 | 0.00005 |
| rs6749014  | 103006448 | 0.009  | -     | 0.022 | -0.144 | 0.00005 |
| rs12712146 | 103008714 | 0.006  | -     | -     | -0.156 | 0.00002 |
| rs4851004  | 103009537 | 0.009  | -     | 0.023 | -0.144 | 0.00005 |
| rs6732138  | 103009662 | 0.009  | -     | -     | -0.146 | 0.00004 |
| rs3771158  | 103009894 | -      | -     | 0.018 | -0.095 | 0.04320 |
| rs1420096  | 103010912 | 0.009  | -     | -     | -0.145 | 0.00005 |
| rs2287033  | 103011237 | 0.009  | -     | 0.022 | -0.145 | 0.00005 |
| rs1568681  | 103014696 | -0.044 | -     | -     | 0.118  | 0.00606 |
| rs1420094  | 103015687 | 0.011  | -     | 0.023 | -0.143 | 0.00005 |
| rs6710528  | 103016142 | 0.009  | -     | 0.022 | -0.142 | 0.00006 |
| rs3732124  | 103018052 | -      | -     | 0.022 | -0.143 | 0.00005 |
| rs4851571  | 103019000 | -      | -     | 0.022 | -0.144 | 0.00005 |
| rs4851572  | 103019031 | 0.009  | -     | 0.022 | -0.144 | 0.00005 |
| rs10202813 | 103019740 | -      | -     | 0.014 | -0.099 | 0.03460 |

|            |           |        |       |       |        |         |
|------------|-----------|--------|-------|-------|--------|---------|
| rs1035129  | 103019785 | 0.009  | -     | -     | -0.145 | 0.00005 |
| rs1035127  | 103019919 | -0.045 | 0.027 | 0.049 | 0.114  | 0.00767 |
| rs6710034  | 103023678 | 0.010  | -     | 0.021 | -0.144 | 0.00005 |
| rs7589142  | 103024660 | 0.010  | -     | -     | -0.145 | 0.00004 |
| rs4851007  | 103024813 | -0.045 | 0.026 | 0.047 | 0.114  | 0.00767 |
| rs4851575  | 103025203 | -0.045 | 0.171 | 0.046 | 0.113  | 0.00811 |
| rs10181785 | 103025274 | -      | -     | 0.010 | -0.097 | 0.03900 |
| rs12712148 | 103025547 | -      | -     | 0.007 | -0.096 | 0.03990 |
| rs11687768 | 103025738 | -      | -     | 0.005 | -0.096 | 0.04110 |
| rs6543126  | 103027104 | 0.009  | -     | -     | -0.144 | 0.00005 |
| rs10203558 | 103027640 | 0.007  | -     | 0.021 | -0.144 | 0.00005 |
| rs10200952 | 103027651 | 0.007  | -     | 0.021 | -0.143 | 0.00006 |
| rs7586983  | 103028066 | -      | -     | 0.008 | -0.096 | 0.04110 |
| rs6543127  | 103028301 | 0.009  | -     | -     | -0.143 | 0.00005 |
| rs4851576  | 103028895 | 0.012  | -     | 0.022 | -0.143 | 0.00005 |
| rs4851577  | 103028921 | 0.017  | -     | 0.021 | -0.143 | 0.00005 |
| rs4851579  | 103028984 | 0.009  | -     | 0.021 | -0.143 | 0.00005 |
| rs6543132  | 103029410 | -0.044 | -     | -     | 0.114  | 0.00799 |
| rs1807782  | 103033147 | -0.017 | 0.023 | 0.045 | 0.115  | 0.00765 |
| rs1035125  | 103033839 | 0.005  | -     | -     | -0.143 | 0.00005 |
| rs2160201  | 103033961 | 0.017  | -     | -     | -0.143 | 0.00005 |
| rs1420106  | 103035044 | -0.043 | 0.022 | 0.045 | 0.113  | 0.00857 |
| rs1420105  | 103035119 | 0.017  | -     | 0.020 | -0.143 | 0.00005 |
| rs11465673 | 103035375 | -      | -     | 0.010 | -0.028 | 0.67400 |
| rs2293223  | 103035468 | -      | -     | 0.003 | -0.097 | 0.03880 |
| rs2293224  | 103035779 | 0.009  | -     | 0.019 | -0.143 | 0.00005 |
| rs6756407  | 103036101 | -      | -     | 0.011 | -0.026 | 0.68800 |
| rs6743516  | 103036335 | 0.009  | -     | 0.019 | -0.143 | 0.00005 |
| rs1420100  | 103037002 | 0.008  | -     | 0.019 | -0.143 | 0.00005 |
| rs3771155  | 103037826 | 0.009  | -     | 0.021 | -0.144 | 0.00005 |
| rs3755267  | 103038587 | -0.043 | 0.023 | 0.032 | 0.113  | 0.00860 |
| rs10206291 | 103038863 | 0.009  | -     | 0.030 | -0.144 | 0.00005 |
| rs885088   | 103039044 | 0.017  | -     | 0.019 | -0.143 | 0.00005 |
| rs3771154  | 103039360 | 0.017  | -     | 0.020 | -0.143 | 0.00005 |
| rs2272128  | 103039929 | -0.042 | 0.023 | 0.029 | 0.116  | 0.00728 |
| rs6759479  | 103040047 | 0.016  | -     | 0.020 | -0.143 | 0.00005 |
| rs11465689 | 103040167 | -      | -     | 0.036 | -0.030 | 0.65000 |
| rs12997015 | 103042401 | 0.002  | -     | -     | 0.011  | 0.91800 |
| rs3755266  | 103042712 | -      | -     | 0.021 | -0.143 | 0.00005 |
| rs11694658 | 103045020 | -      | -     | 0.006 | 0.108  | 0.01160 |
| rs7559845  | 103046214 | -      | -     | 0.021 | -0.142 | 0.00006 |
| rs2310300  | 103049074 | -      | -     | 0.022 | -0.142 | 0.00006 |

|            |           |        |        |          |        |         |
|------------|-----------|--------|--------|----------|--------|---------|
| rs10166330 | 103050390 | -      | -      | 0.009    | -0.088 | 0.06110 |
| rs3755265  | 103052816 | -      | 0.052  | 0.018    | -0.142 | 0.00006 |
| rs10176820 | 103054420 | -      | -      | 0.009    | -0.089 | 0.05920 |
| rs2058659  | 103054556 | -      | 0.053  | 0.016    | -0.142 | 0.00006 |
| rs13021177 | 103056493 | -      | 0.042  | 0.029    | -0.143 | 0.00005 |
| rs2075186  | 103057251 | -      | -      | 0.002    | -0.091 | 0.05410 |
| rs11465736 | 103067930 | -      | -      | 2.79e-05 | -0.096 | 0.04130 |
| rs17821875 | 103071030 | -      | -      | 0.127    | -0.014 | 0.82500 |
| rs10169676 | 103074919 | -      | -      | 2.87e-05 | -0.089 | 0.05970 |
| rs10210176 | 103079516 | -      | -      | 0.001    | -0.082 | 0.08120 |
| rs10172116 | 103087573 | -      | -      | 2.31e-04 | -0.110 | 0.02050 |
| rs1403552  | 103088777 | -      | -      | 0.001    | -0.088 | 0.06140 |
| rs7597819  | 103092906 | -      | -      | 0.021    | 0.113  | 0.00947 |
| rs6737668  | 103093081 | -      | 0.026  | 0.027    | 0.113  | 0.00941 |
| rs10469840 | 103093243 | -      | -      | 0.032    | 0.107  | 0.01430 |
| rs759382   | 103094213 | -      | 0.011  | -        | 0.105  | 0.01420 |
| rs9989749  | 103123642 | -      | 0.033  | -        | 0.065  | 0.15300 |
| rs6751949  | 103125138 | -      | 0.009  | -        | 0.070  | 0.11200 |
| rs4851607  | 103125632 | -      | 0.002  | -        | 0.079  | 0.07400 |
| rs10195948 | 103125736 | -      | 0.004  | -        | 0.085  | 0.05510 |
| rs2192757  | 103132378 | -      | 0.004  | -        | 0.080  | 0.06250 |
| rs1916307  | 103134180 | -0.042 | -      | -        | 0.089  | 0.03680 |
| rs1523203  | 103135759 | -      | 0.020  | -        | 0.082  | 0.05570 |
| rs1403551  | 103136446 | -      | 0.021  | -        | 0.082  | 0.05510 |
| rs4851613  | 103137990 | -      | 0.021  | -        | 0.084  | 0.05080 |
| rs6750851  | 103138761 | -      | 0.021  | -        | 0.081  | 0.05790 |
| rs6750971  | 103138825 | -      | 0.021  | -        | 0.083  | 0.05240 |
| rs10193407 | 103139298 | -      | 0.042  | -        | 0.083  | 0.05350 |
| rs17774619 | 103216776 | 0.115  | -      | -        | -0.393 | 0.02020 |
| rs1016160  | 103245025 | -      | -      | 0.011    | 0.086  | 0.09020 |
| rs17027893 | 103370379 | -      | -0.008 | -        | -0.022 | 0.65500 |
| rs10172680 | 103376383 | -      | -0.011 | -        | -0.011 | 0.81800 |
| rs2080294  | 103382425 | -      | -0.012 | -        | -0.012 | 0.81600 |
| rs6705433  | 103386225 | -      | -0.011 | -        | -0.016 | 0.74600 |
| rs6705568  | 103386368 | -      | -0.010 | -        | -0.014 | 0.77400 |
| rs2310358  | 103413658 | -      | -0.041 | -        | -0.076 | 0.27400 |
| rs75535834 | 103784955 | 0.154  | -      | -        | 0.157  | 0.29300 |
| rs6740972  | 103837781 | 0.028  | -      | -        | -0.042 | 0.29600 |
| rs7582789  | 103860075 | -0.003 | -      | -        | 0.126  | 0.20300 |

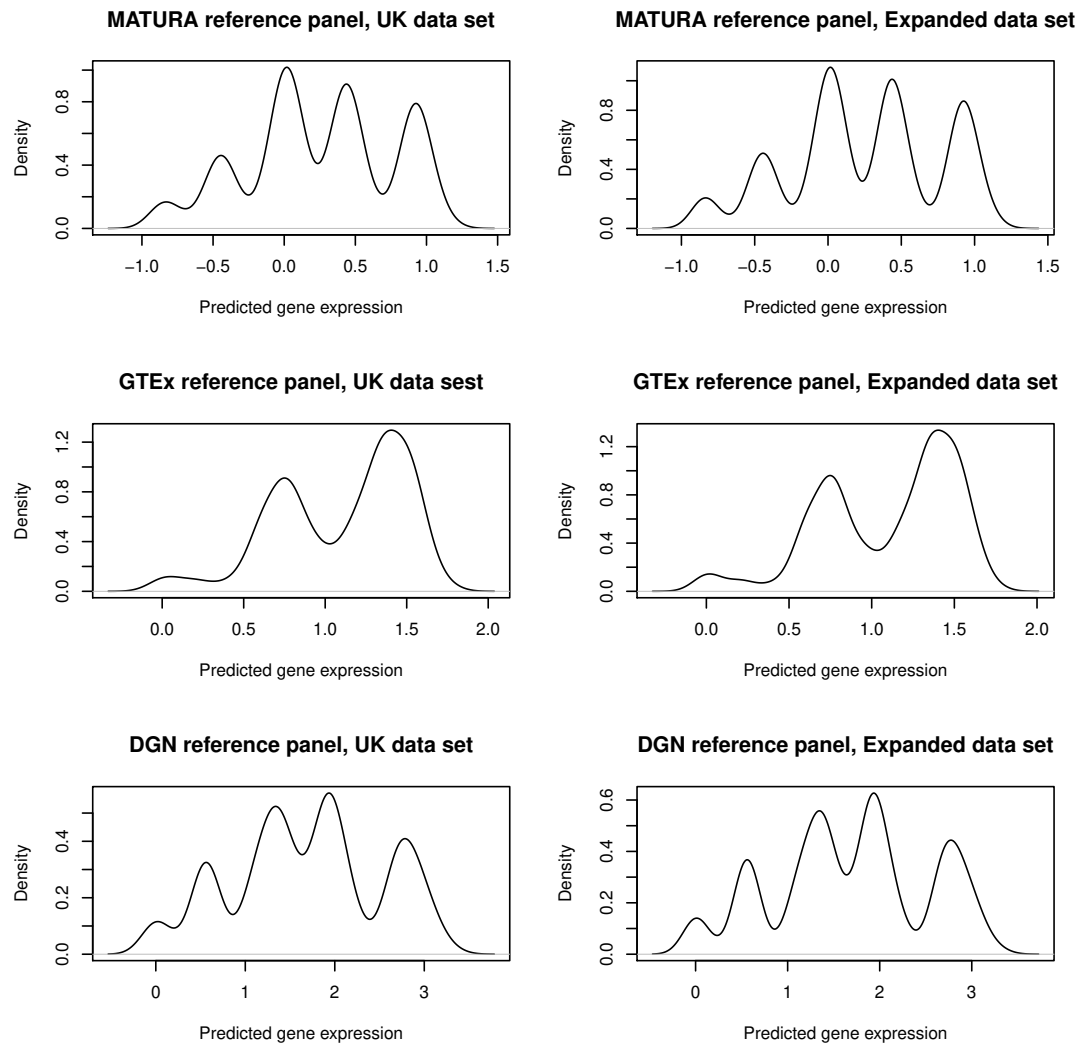

**Figure S1.** Density estimates (calculated using the `density()` function in R) of the predicted genetically-regulated gene expression at *IL18RAP* in the UK and expanded European ancestry cohorts.

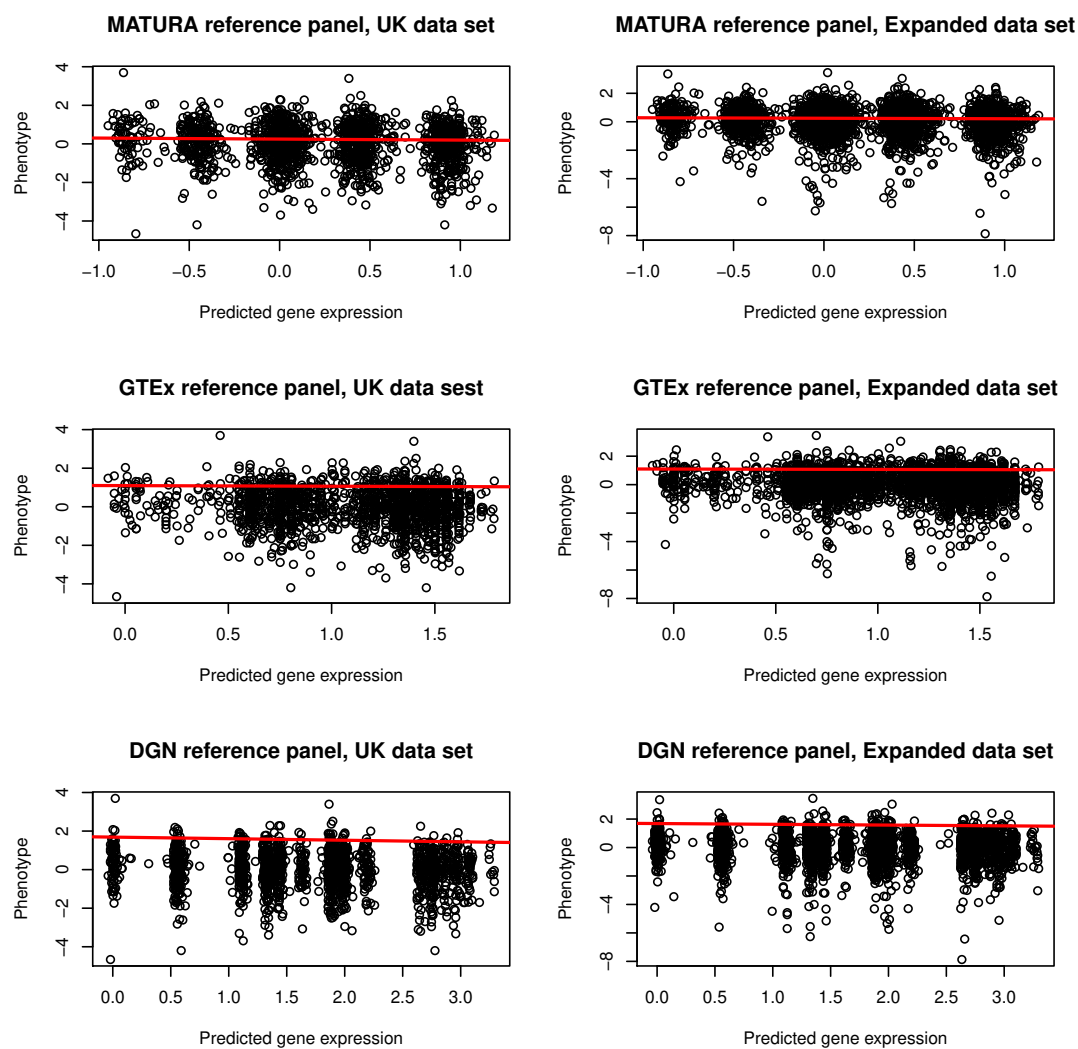

**Figure S2.** Plots of the linear regressions that are being fitted at *IL18RAP* in the UK and expanded European ancestry cohorts. Estimated regression lines are shown in red.
